# Supplementary material for: Ultra-efficient energy transfer and near-infrared luminescence in hexagonal aluminate phosphors enabled by heterogeneous ion pairs co-doping
Source: Royal Society of Chemistry journal article supplement (doi:10.1039/d5qi02197a), 2026-01-01
Supplement: d5qi02197a1.pdf [file d5qi02197a1.pdf]

## Electronic Supplementary Information (ESI)

### Ultra-efficient energy transfer and near-infrared luminescence in hexagonal aluminate phosphors enabled by heterogeneous ion pairs co-doping

Xiaoyi Liu<sup>1</sup>, Zhaojiang Liu<sup>2</sup>, Yujuan Dong<sup>2</sup>, Chuang Wang<sup>\*2</sup>, Yichao Wang<sup>\*3</sup>, Ge Zhu<sup>\*4</sup>, Shuangyu Xin<sup>4</sup>

<sup>1</sup>College of Chemistry, Bohai University, Jinzhou, 121000, P. R. China.

<sup>2</sup>College of Materials and Environmental Engineering, Bohai University, Jinzhou, 121000, P. R. China.

<sup>3</sup>College of Science, Dalian Maritime University, Dalian, 116026, P. R. China.

<sup>4</sup>Key Laboratory of New Energy and Rare Earth Resource Utilization of State Ethnic Affairs Commission, College of Physics and Materials Engineering, Dalian Minzu University, 18 Liaohe West Road, Dalian, 116600, P. R. China.

*\*Corresponding Author.*

*E-mail address: wangchuangbhu@163.com, wangyc2020@dlmu.edu.cn, zhuge06@126.com*

## Experimental section

### Materials and Synthesis of green phosphors

A series of  $\text{LaMgAl}_{11}\text{O}_{19}:x\text{Cr}^{3+}$  ( $x = 0\%, 0.05\%, 0.1\%, 0.3\%, 0.5\%, 0.7\%$  and  $0.9\%$ ),  $\text{LaMgAl}_{11}\text{O}_{19}:y\text{Mn}^{2+}$  ( $y = 0\%, 5\%, 10\%, 15\%, 20\%, 25\%, 30\%, 35\%$  and  $40\%$ ) and  $\text{LaMgAl}_{11}\text{O}_{19}:20\%\text{Mn}^{2+}, x\text{Cr}^{3+}$  ( $x = 0\%, 0.05\%, 0.1\%, 0.3\%, 0.5\%, 0.7\%$  and  $0.9\%$ ) phosphors were prepared via High temperature solid phase method. In a typical synthesis process of  $\text{LaMgAl}_{11}\text{O}_{19}:20\%\text{Mn}^{2+}, 0.5\%\text{Cr}^{3+}$ , the raw materials  $\text{La}_2\text{O}_3$  (99.9%, Macklin),  $\text{MgO}$  (98.0%, Macklin),  $\text{Al}_2\text{O}_3$  (99.0% Macklin),  $\text{MnCO}_3$  (99.95%, Macklin) and  $\text{Cr}_2\text{O}_3$  (99.9%, Macklin) were weighed stoically and then ground and mixed in an agate mortar. Then mixture was then put into a crucible and sintered in a reducing atmosphere ( $\text{H}_2$ ) at  $1600\text{ }^\circ\text{C}$  for 4 h. Finally, target product was collected after cooling to room temperature. Similarly, all other samples were obtained by the same synthesis method except for stoichiometric ratios.

### Characterizations

The phase purity of the as-synthesized samples was performed on a DX-2700BHX X-ray diffractometer (XRD) with  $\text{Cu K}\alpha$  radiation ( $\lambda = 0.15406\text{ nm}$ ). Rietveld refinement of XRD data was carried out on the General Structure Analysis System (GSAS) program. The morphology and composition of the samples were observed via transmission electron microscope (TEM, JEM-F200). The samples were studied by spherical distortion corrected high-angle annular dark-field scanning transmission electron microscope (HAADF-STEM). Element compositions and chemical valence state of the phosphors were detected via X-ray photoelectron spectroscopy (XPS, Axis

Supra+). Excitation spectra, emission spectra and fluorescence decay curves were collected by FLS-1000 fluorescence spectrophotometer equipped with the 150 W xenon lamp as light source. The electron spin resonance (EPR) test was conducted using the Bruker ESR5000 type electron paramagnetic resonance spectrometer (Germany). Take 25 mg of the dried sample and place it in a quartz EPR sample tube (5 mm in diameter). Insert the tube into the center of the resonant cavity, connect it to the low-temperature control system, gradually cool it to 100 K and maintain a stable temperature. Start the scan and record the EPR spectrum. The power is 5.0 mW, attenuation is 13.0 dB, microwave frequency is approximately 9.451389 GHz (X-band). Scanning parameters: sweep time is 30 s, modulation amplitude is 0.20000 mT, modulation frequency is 100 kHz. Photoluminescence quantum yield (PLQY) was collected via the fluorescence spectrophotometer (FLS-1000, Edinburgh Instruments Ltd., UK), in which the BaSO<sub>4</sub> powder was used as a reference to determine the absorption. The temperature dependence photoluminescence spectra properties of the as-prepared samples at different temperatures ranging from 25 °C to 250 °C were estimated by FLS-1000.

#### Density Functional Theory (DFT) Calculation

The calculation of DFT is carried out in the PBE scheme by the Vienna ab initio simulation package (VASP) software package. The 2×2×2 supercells were established for the following calculations. The projector augment wave (PAW) pseudopotentials are chosen to describe the interactions function of elements. According to the convergence test calculations of host, all the calculation process took a k-point grids of 8×8×2. In addition, the positions of all ions were considered as relaxation when the

residual force was less than 0.01 eV/Å.

#### Fabrication of LED devices

The as-prepared near-infrared phosphors ( $\text{LaMgAl}_{11}\text{O}_{19}:0.5\%\text{Cr}^{3+}$  or  $\text{LaMgAl}_{11}\text{O}_{19}:20\%\text{Mn}^{2+}, 0.5\%\text{Cr}^{3+}$ ) were first mixed with type A organic resin and type B curing agent, and coated on a 460 nm (1W) blue chips. then the mixtures were cured at 150 °C for 2 h to form the final near-infrared pc-LED devices. Full spectrum WLED device was encapsulated by mixing as-synthesized  $\text{LaMgAl}_{11}\text{O}_{19}:20\%\text{Mn}^{2+}, 0.5\%\text{Cr}^{3+}$  phosphor, commercial  $(\text{Ba}, \text{Sr})_2\text{SiO}_4:\text{Eu}^{2+}$  green phosphor,  $\text{CaAlSiN}_3:\text{Eu}^{2+}$  red phosphor, type A organic resin and type B curing agent with 460 nm blue chip (1 W). Electroluminescence performances were measured at 15 V voltage and 50 ~ 350 mA current on the SSP6612 photoelectric measurement system.

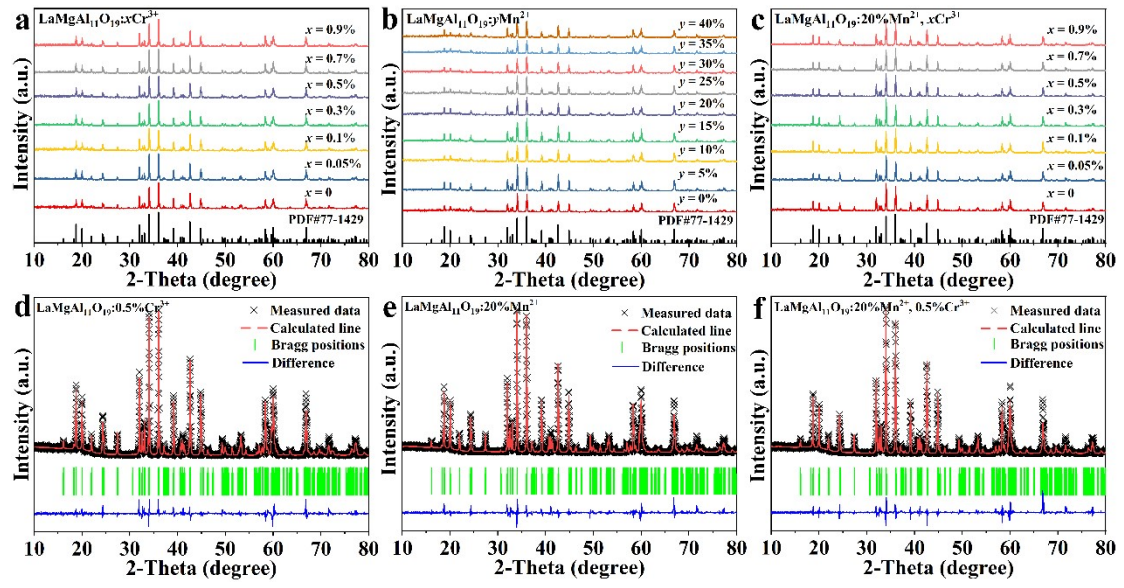

**Fig. S1** XRD patterns of  $\text{LaMgAl}_{11}\text{O}_{19}:x\text{Cr}^{3+}$  ( $x = 0, 0.05\%, 0.1\%, 0.3\%, 0.5\%, 0.7\%$  and  $0.9\%$ ) (a),

$\text{LaMgAl}_{11}\text{O}_{19}:y\text{Mn}^{2+}$  ( $y = 0\%, 5\%, 10\%, 15\%, 20\%, 25\%, 30\%, 35\%$  and  $40\%$ ) (b) and

$\text{LaMgAl}_{11}\text{O}_{19}:20\%\text{Mn}^{2+}, x\text{Cr}^{3+}$  ( $x = 0, 0.05\%, 0.1\%, 0.3\%, 0.5\%, 0.7\%$  and  $0.9\%$ ) and Rietveld

refinement for the typical XRD patterns of  $\text{LaMgAl}_{11}\text{O}_{19}:0.5\%\text{Cr}^{3+}$  (d),  $\text{LaMgAl}_{11}\text{O}_{19}:20\%\text{Mn}^{2+}$

(e) and  $\text{LaMgAl}_{11}\text{O}_{19}:20\%\text{Mn}^{2+}, 0.5\%\text{Cr}^{3+}$  (f)

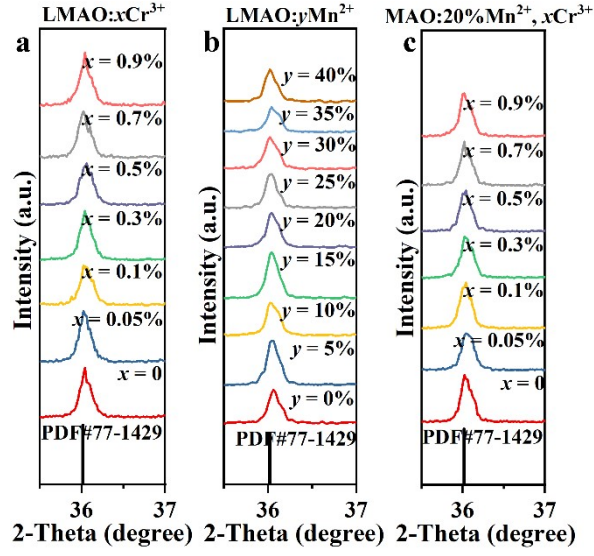

**Fig. S2** The magnified XRD curves in the  $2\theta$  range of  $35.5^{\circ}$ - $37^{\circ}$  of LMAO: $x\text{Cr}^{3+}$  ( $x = 0, 0.05\%$ ,  $0.1\%$ ,  $0.3\%$ ,  $0.5\%$ ,  $0.7\%$  and  $0.9\%$ ) (a), LMAO: $y\text{Mn}^{2+}$  ( $y = 0\%$ ,  $5\%$ ,  $10\%$ ,  $15\%$ ,  $20\%$ ,  $25\%$ ,  $30\%$ ,  $35\%$  and  $40\%$ ) (b) and LMAO: $20\%\text{Mn}^{2+}$ ,  $x\text{Cr}^{3+}$  ( $x = 0, 0.05\%$ ,  $0.1\%$ ,  $0.3\%$ ,  $0.5\%$ ,  $0.7\%$  and  $0.9\%$ ) (c)

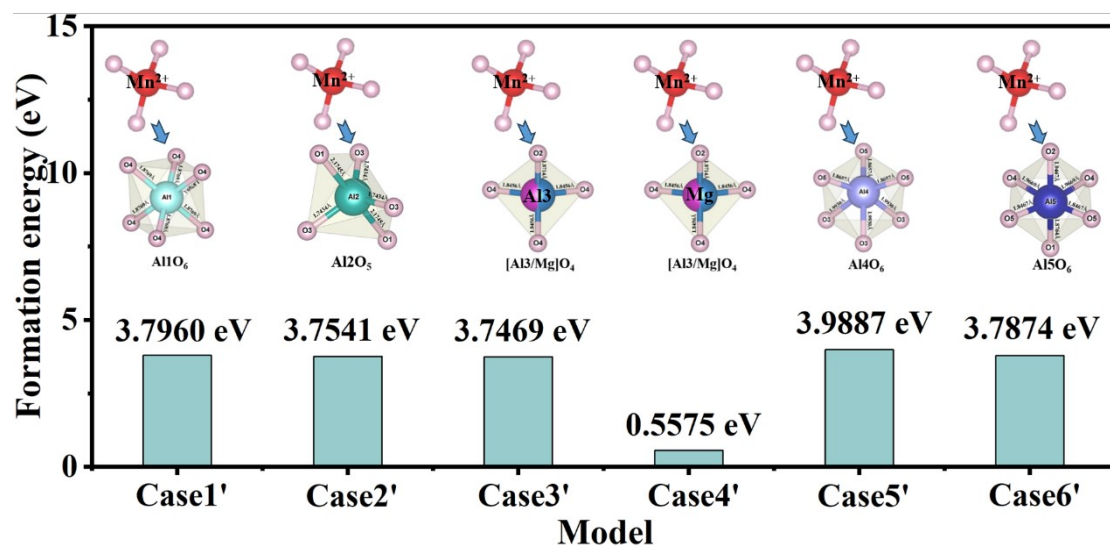

Fig. S3 Formation energy diagram comparing each available doping model in  $\text{LMAO}:\text{Mn}^{2+}$

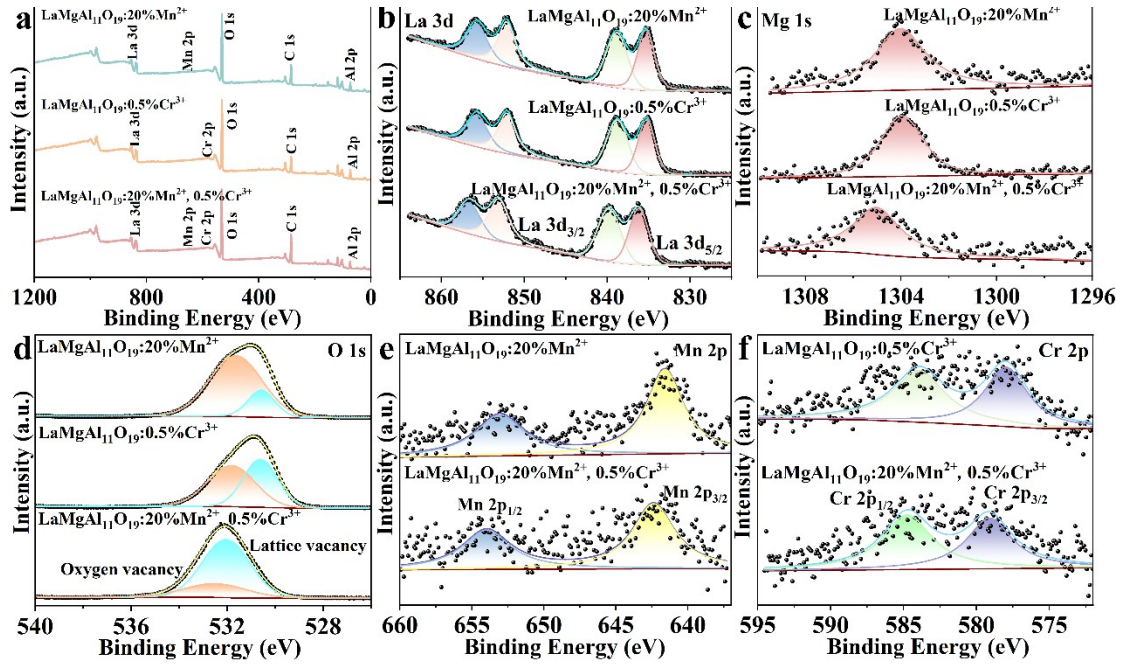

**Fig. S4** XPS spectra (a), high resolution XPS spectra of La 3d (b), Mg 1s (c), O 1s (d), Mn 2p (e)

and Cr 2p (f) for  $\text{LaMgAl}_{11}\text{O}_{19}:\text{20\%Mn}^{2+}$ ,  $\text{LaMgAl}_{11}\text{O}_{19}:\text{0.5\%Cr}^{3+}$  and  $\text{LaMgAl}_{11}\text{O}_{19}:\text{20\%Mn}^{2+}, \text{0.5\%Cr}^{3+}$

$\text{0.5\%Cr}^{3+}$



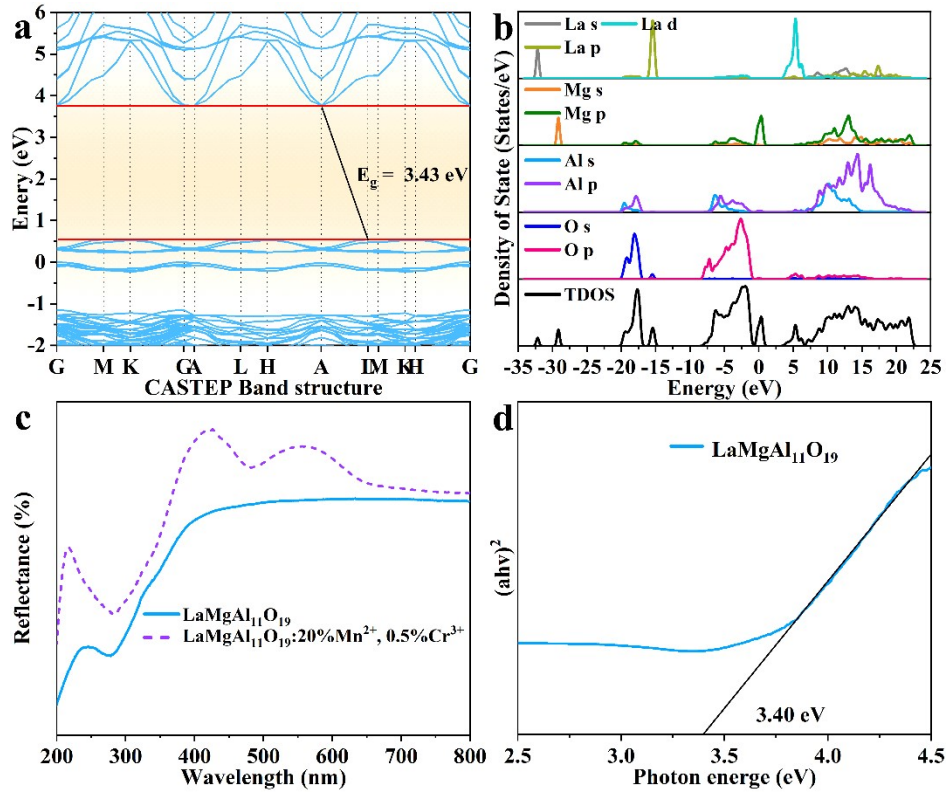

**Fig. S5** Band structure (a) and total and partial DOS (b) of  $\text{LaMgAl}_{11}\text{O}_{19}$ , diffuse reflectance spectra of  $\text{LaMgAl}_{11}\text{O}_{19}$  and  $\text{LaMgAl}_{11}\text{O}_{19}:\text{20\%Mn}^{2+}, \text{0.5\%Cr}^{3+}$  (c) and band-gap energies of  $\text{LaMgAl}_{11}\text{O}_{19}$  (d)

#### Computational Findings of Crystals Based on DFT

To gain further insight into the electronic structures of  $\text{LaMgAl}_{11}\text{O}_{19}$ , density functional theory (DFT) calculations are employed to estimate the band gap energy. **Fig. S5a** shows the calculated band structure of  $\text{LaMgAl}_{11}\text{O}_{19}$ . DFT calculation results of pure  $\text{LaMgAl}_{11}\text{O}_{19}$  exist the exact conduction band bottom at A point and valance band maximum at L point, which suggests it is an indirect band gap with  $\sim 3.43$  eV value. The calculated value is quite close to the optical band gap value of  $\sim 3.4$  eV. **Fig. S5b** shows the total and partial densities of states (DOS) for different atoms, the conduction band minimum (CBM) of  $\text{LaMgAl}_{11}\text{O}_{19}$  mainly contributed by La 5d orbitals and valance band maximum (VBM) is derived from by Mg 2p orbitals. The

bandgaps are calculated using the Kubelka-Munk function (equation (1) and (2)) based on the diffuse reflectance spectra (**Fig. S5c**):<sup>1</sup>

$$[F(R_{\infty})h\nu]^n = C(h\nu - E_g) \quad (1)$$

$$F(R_{\infty}) = (1 - R)^2/2R \quad (2)$$

Where  $h\nu$  represents photon energy, the value of exponent  $n$  indicates transition coefficient,  $n = 2$  or  $1/2$  denotes the direct or indirect band gap respectively,  $\text{LaMgAl}_{11}\text{O}_{19}$  belongs to indirect band gap, so  $n$  value is  $1/2$ ,  $C$  stands the proportionality constant,  $E_g$  signifies the band gap value,  $R$  is reflection coefficient. After calculation, the band gap of  $\text{LaMgAl}_{11}\text{O}_{19}$  is 3.40 eV, and the electronic band structure of the sample can be corresponded to the optical band gap obtained by the absorption spectra (**Fig. S5d**), indicating that  $\text{LaMgAl}_{11}\text{O}_{19}$  is suitable as a potential host.

As shown in **Fig. 3b**, the Tanabe-Sugano energy level diagram of  $\text{Cr}^{3+}$  in  $\text{LaMgAl}_{11}\text{O}_{19}$  shows that the  ${}^4\text{T}_{1g}$  and  ${}^4\text{T}_{2g}$  energy levels strongly depend on the crystal field intensity, while the position of the  ${}^2\text{E}_g$  energy level has little relationship with the crystal field intensity  $D_q$ . Therefore, the  ${}^4\text{A}_{2g} \rightarrow {}^4\text{T}_{1g}$ ,  ${}^4\text{A}_{2g} \rightarrow {}^4\text{T}_{2g}$  and  ${}^2\text{E}_g \rightarrow {}^4\text{A}_{2g}$  levels energies of the  $\text{LaMgAl}_{11}\text{O}_{19}:0.5\% \text{Cr}^{3+}$  are  $23810\text{cm}^{-1}$ ,  $17319\text{cm}^{-1}$  and  $14025\text{cm}^{-1}$ , respectively. According to equation (1), the local crystal field intensity  $D_q$  of  $\text{Cr}^{3+}$  in  $\text{LaMgAl}_{11}\text{O}_{19}$  can be determined:<sup>2,3</sup>

$$E({}^4\text{T}_{2g}) = 10D_q(1)$$

For the  $\text{LaMgAl}_{11}\text{O}_{19}:0.5\% \text{Cr}^{3+}$  sample, the Racah parameter  $B$  can be calculated to be  $625\text{cm}^{-1}$  using equation (2-3):<sup>2,3</sup>

$$\Delta E = E({}^4\text{T}_{1g}) - E({}^4\text{T}_{2g})(2)$$

$$\frac{D_q}{B} = \frac{15\left(\frac{\Delta E}{D_q} - 8\right)}{\left(\frac{\Delta E}{D_q}\right)^2 - 10\frac{\Delta E}{D_q}}(3)$$

Here, the energy difference between  ${}^4\text{T}_{1g}$  and  ${}^4\text{T}_{2g}$  is calculated as  $6419\text{cm}^{-1}$ .

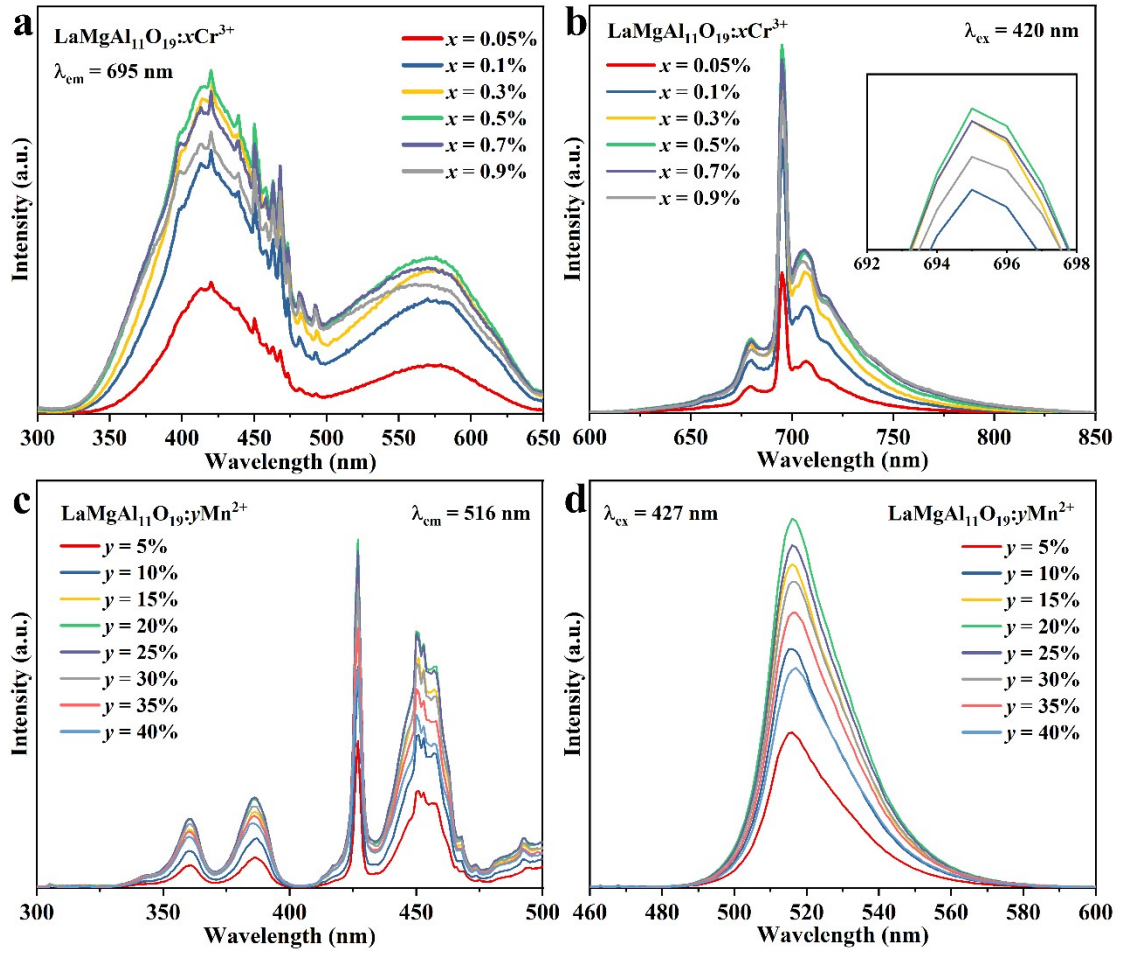

**Fig. S6** Excitation and emission spectra of  $\text{LaMgAl}_{11}\text{O}_{19}:\text{xCr}^{3+}$  ( $x = 0, 0.05\%, 0.1\%, 0.3\%, 0.5\%, 0.7\%$  and  $0.9\%$ ) (a and b) and  $\text{LaMgAl}_{11}\text{O}_{19}:\text{yMn}^{2+}$  ( $y = 5\%, 10\%, 15\%, 20\%, 25\%, 30\%, 35\%$  and  $40\%$ ) (b and d)

In order to further determine the mechanism of concentration quenching, the critical distance ( $R_c$ ) between adjacent  $\text{Mn}^{4+}$  ions will be calculated by equation (3):<sup>4</sup>

$$R_c \approx 2 \times \left[ \frac{3V}{4\pi x_c N} \right]^{\frac{1}{3}} \quad (3)$$

Here  $V$  represents the unit cell volume,  $N$  is the number of available sites of  $\text{Cr}^{3+}$  can substitute in the host and  $x_c$  stands the critical  $\text{Cr}^{3+}$  concentration in the matrix. For  $\text{LaMgAl}_{11}\text{O}_{19}:\text{Cr}^{3+}$  phosphor,  $V = 594.8 \text{ \AA}^3$ ,  $x_c = 0.05$  and  $N = 2$ . Therefore, the calculated  $R_c$  value is  $22.47 \text{ \AA}$ , which is much higher than the critical value of the

interion exchange interaction and the electric multipole interaction ( $R_c = 5 \text{ \AA}$ ), which means that the electric multipole interaction plays a dominant role in the occurrence of the concentration quenching phenomenon. Based on Dexter theory, the type of electric multipole interaction is further studied and the relationship between  $\log(x)$  and  $\log(I/x)$  is obtained by equation (4) and simplified equation (5).<sup>5</sup>

$$\frac{I}{x} = k \left[ 1 + \beta(x)^{\frac{\theta}{3}} \right]^{-1} \quad (4)$$

$$\log(I/x) = -\frac{\theta}{3} \log(x) + A \quad (5)$$

Where  $I$  is the photoluminescence intensity,  $x$  represents the  $\text{Cr}^{3+}$  concentration, and  $k$  and  $\beta$  are constants. A line with the slope of  $-0.74$  ( $-\theta/3$ ) can be obtained by fitting,  $\theta = 2.22$  is closest to 6, so the concentration quenching mechanism is a dipole-dipole interaction.

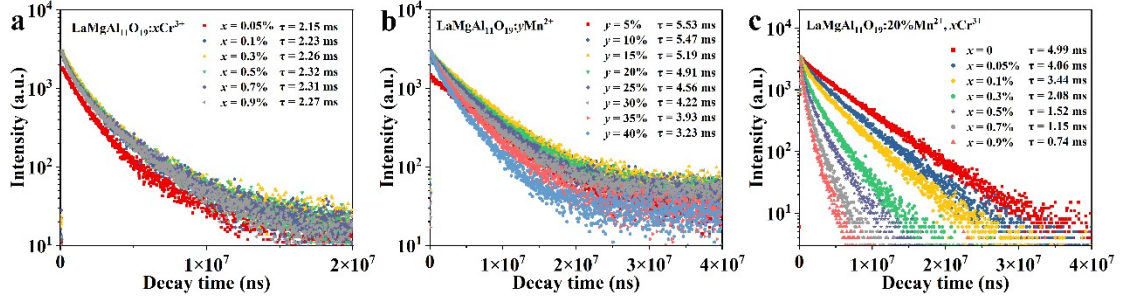

**Fig. S7** Decay curves of LaMgAl<sub>11</sub>O<sub>19</sub>:xCr<sup>3+</sup> ( $x = 0, 0.05\%, 0.1\%, 0.3\%, 0.5\%, 0.7\%$  and  $0.9\%$ )

(a), LaMgAl<sub>11</sub>O<sub>19</sub>:yMn<sup>2+</sup> ( $y = 5\%, 10\%, 15\%, 20\%, 25\%, 30\%, 35\%$  and  $40\%$ ) (b) and

LaMgAl<sub>11</sub>O<sub>19</sub>:20%Mn<sup>2+</sup>, xCr<sup>3+</sup> ( $x = 0, 0.05\%, 0.1\%, 0.3\%, 0.5\%, 0.7\%$  and  $0.9\%$ ) under 427 nm

excitation and 625 nm monitoring

Accordingly, as shown in **Fig. S6a** and **b**, under 420 nm excitation and 695 nm monitoring and 427 nm excitation and 516 nm monitoring, the fluorescence decay curves of a series of green phosphors with different Cr<sup>3+</sup> and Mn<sup>2+</sup> ions doping concentrations were fitted by double exponential equation (6)-(7):<sup>6</sup>

$$I_t = I_0 + A_1 \exp\left(-t/\tau_1\right) + A_2 \exp\left(-t/\tau_2\right) \quad (6)$$

$$\tau^* = \frac{A_1 \tau_1^2 + A_2 \tau_2^2}{A_1 \tau_1 + A_2 \tau_2} \quad (7)$$

where  $I(t)$  and  $I_0$  represent the emission intensity at moment  $t$  and initial fluorescence intensity of the as-prepared samples,  $A_1$  and  $A_2$  are a constant, and  $\tau_1$  and  $\tau_2$  denote the fluorescence decay time,  $\tau^*$  stands for average lifetime.

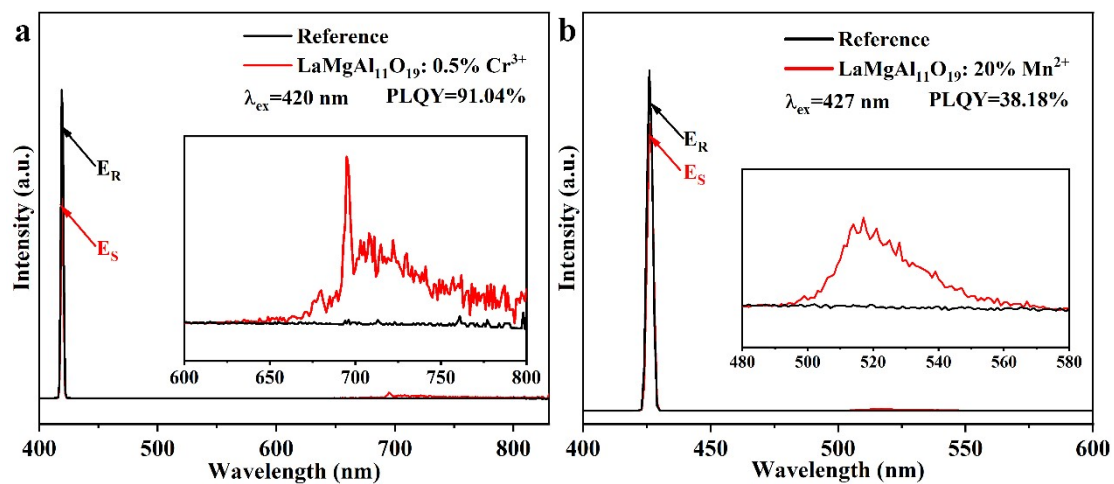

**Fig. S8** PLQY spectra of LMAO:0.5%Cr<sup>3+</sup> ( $\lambda_{ex} = 420$  nm, Scatter Range: 409.00 to 429.00 nm,

Emission Range: 617.00 to 847.00 nm) (a) and LMAO:20%Mn<sup>2+</sup> ( $\lambda_{ex} = 427$  nm, Scatter Range:

414.00 to 436.00 nm, Emission Range: 492.00 to 576.00 nm) (b)

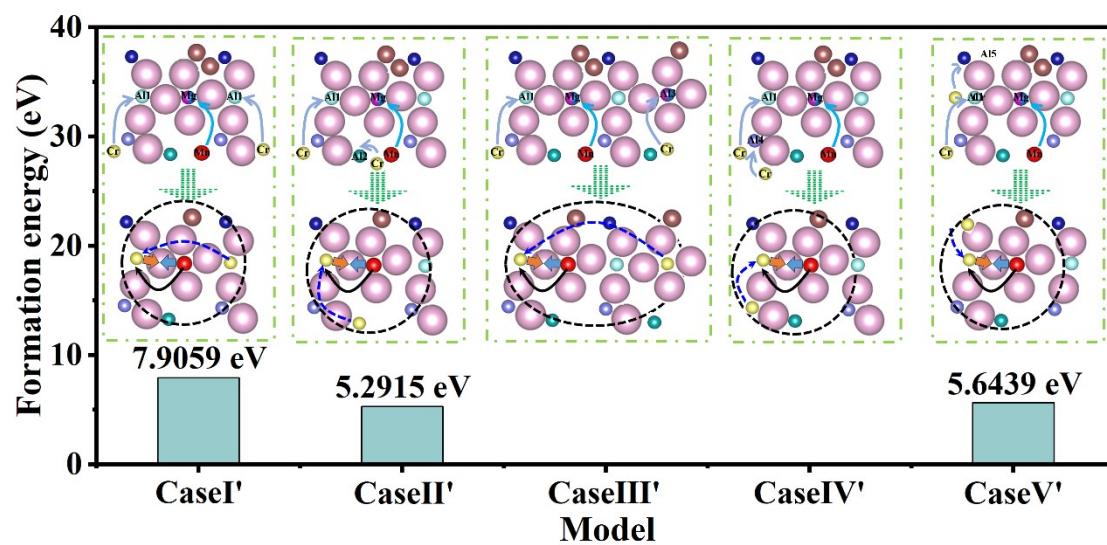

**Fig. S9** Formation energy diagram comparing each available doping model in LMAO:Mn<sup>2+</sup>, Cr<sup>3+</sup> (Cr<sup>3+</sup>-Cr<sup>3+</sup> ion pairs)



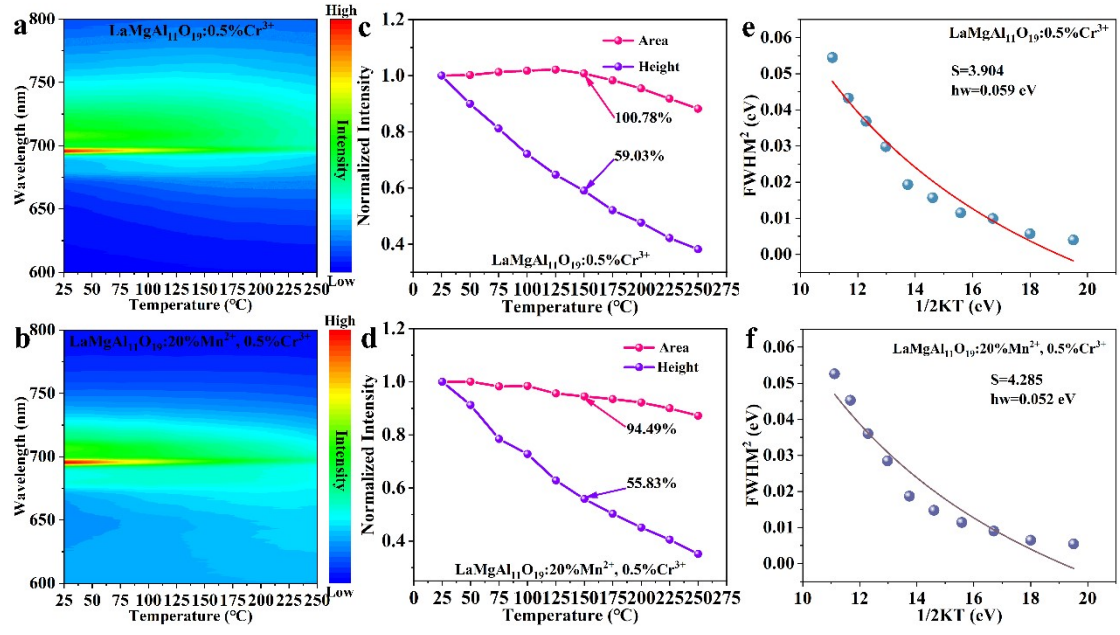

**Fig. S10** Temperature-dependent emission spectra, relative intensity and fitting curve of FWHM<sup>2</sup> versus  $1/2kT$  of  $\text{LaMgAl}_{11}\text{O}_{19}:0.5\%\text{Cr}^{3+}$  (a, c and e) and  $\text{LaMgAl}_{11}\text{O}_{19}:20\%\text{Mn}^{2+}, 0.5\%\text{Cr}^{3+}$  (b, d and f)

**Table S1** Cell parameters of LMAO: $x\text{Cr}^{3+}$  ( $x = 0, 0.05\%, 0.1\%, 0.3\%, 0.5\%, 0.7\%$  and  $0.9\%$ )

samples

| Sample                     | Crystal structure | Space group   | Cell parameters |         |                       |
|----------------------------|-------------------|---------------|-----------------|---------|-----------------------|
|                            |                   |               | $a = b$ (Å)     | $c$ (Å) | $V$ (Å <sup>3</sup> ) |
| LMAO                       | Hexagonal         | P63/mmc (194) | 5.592           | 21.965  | 594.8                 |
| LMAO:0%Cr <sup>3+</sup>    | Hexagonal         | P63/mmc (194) | 5.593           | 21.945  | 594.40                |
| LMAO:0.05%Cr <sup>3+</sup> | Hexagonal         | P63/mmc (194) | 5.593           | 21.939  | 594.25                |
| LMAO:0.1%Cr <sup>3+</sup>  | Hexagonal         | P63/mmc (194) | 5.591           | 21.950  | 594.16                |
| LMAO:0.3%Cr <sup>3+</sup>  | Hexagonal         | P63/mmc (194) | 5.590           | 21.946  | 593.93                |
| LMAO:0.5%Cr <sup>3+</sup>  | Hexagonal         | P63/mmc (194) | 5.590           | 21.948  | 593.88                |
| LMAO:0.7%Cr <sup>3+</sup>  | Hexagonal         | P63/mmc (194) | 5.590           | 21.948  | 593.87                |
| LMAO:0.9%Cr <sup>3+</sup>  | Hexagonal         | P63/mmc (194) | 5.590           | 21.941  | 593.78                |

**Table S2** Cell parameters of LMAO:yMn<sup>2+</sup> (y = 0%, 5%, 10%, 15%, 20%, 25%, 30%, 35% and 40%) samples

| Sample                   | Crystal structure | Space group   | Cell parameters |         |                       |
|--------------------------|-------------------|---------------|-----------------|---------|-----------------------|
|                          |                   |               | $a = b$ (Å)     | $c$ (Å) | $V$ (Å <sup>3</sup> ) |
| LMAO                     | Hexagonal         | P63/mmc (194) | 5.592           | 21.965  | 594.80                |
| LMAO:0%Mn <sup>2+</sup>  | Hexagonal         | P63/mmc (194) | 5.588           | 21.922  | 592.83                |
| LMAO:5%Mn <sup>2+</sup>  | Hexagonal         | P63/mmc (194) | 5.589           | 21.943  | 593.66                |
| LMAO:10%Mn <sup>2+</sup> | Hexagonal         | P63/mmc (194) | 5.589           | 21.944  | 593.71                |
| LMAO:15%Mn <sup>2+</sup> | Hexagonal         | P63/mmc (194) | 5.591           | 21.938  | 593.89                |
| LMAO:20%Mn <sup>2+</sup> | Hexagonal         | P63/mmc (194) | 5.591           | 21.944  | 594.12                |
| LMAO:25%Mn <sup>2+</sup> | Hexagonal         | P63/mmc (194) | 5.591           | 21.955  | 594.40                |
| LMAO:30%Mn <sup>2+</sup> | Hexagonal         | P63/mmc (194) | 5.591           | 21.959  | 594.45                |
| LMAO:35%Mn <sup>2+</sup> | Hexagonal         | P63/mmc (194) | 5.592           | 21.953  | 594.51                |
| LMAO:40%Mn <sup>2+</sup> | Hexagonal         | P63/mmc (194) | 5.593           | 21.959  | 594.78                |

**Table S3** Cell parameters of , and LMAO:20%Mn<sup>2+</sup>, xCr<sup>3+</sup> (x = 0, 0.05%, 0.1%, 0.3%, 0.5%, 0.7% and 0.9%) samples

| Sample                                           | Crystal structure | Space group   | Cell parameters |         |                       |
|--------------------------------------------------|-------------------|---------------|-----------------|---------|-----------------------|
|                                                  |                   |               | $a = b$ (Å)     | $c$ (Å) | $V$ (Å <sup>3</sup> ) |
| LMAO                                             | Hexagonal         | P63/mmc (194) | 5.592           | 21.965  | 594.80                |
| LMAO:20%Mn <sup>2+</sup> , 0%Cr <sup>3+</sup>    | Hexagonal         | P63/mmc (194) | 5.594           | 21.954  | 594.88                |
| LMAO:20%Mn <sup>2+</sup> , 0.05%Cr <sup>3+</sup> | Hexagonal         | P63/mmc (194) | 5.592           | 21.955  | 594.51                |
| LMAO: 20%Mn <sup>2+</sup> , 0.1%Cr <sup>3+</sup> | Hexagonal         | P63/mmc (194) | 5.593           | 21.957  | 594.73                |
| LMAO: 20%Mn <sup>2+</sup> , 0.3%Cr <sup>3+</sup> | Hexagonal         | P63/mmc (194) | 5.592           | 21.948  | 594.42                |
| LMAO: 20%Mn <sup>2+</sup> , 0.5%Cr <sup>3+</sup> | Hexagonal         | P63/mmc (194) | 5.593           | 21.960  | 594.84                |
| LMAO: 20%Mn <sup>2+</sup> , 0.7%Cr <sup>3+</sup> | Hexagonal         | P63/mmc (194) | 5.592           | 21.953  | 594.50                |
| LMAO: 20%Mn <sup>2+</sup> , 0.9%Cr <sup>3+</sup> | Hexagonal         | P63/mmc (194) | 5.590           | 21.938  | 593.68                |

**Table S4** Refined structural parameters of LaMgAl<sub>11</sub>O<sub>19</sub>:0.1%Cr<sup>3+</sup>

|    | Atom | x        | y         | z        | Occ.  | Site |                                                      |                                          |
|----|------|----------|-----------|----------|-------|------|------------------------------------------------------|------------------------------------------|
| 1  | Al1  | 0.000    | 0.000     | 0.000    | 0.700 | 2a   | space<br>group                                       | <i>P6<sub>3</sub>/mmc</i><br>(194)       |
| 2  | Mg1  | 0.000    | 0.000     | 0.000    | 0.250 | 2a   |                                                      |                                          |
| 3  | Cr1  | 0.000    | 0.000     | 0.000    | 0.050 | 2a   |                                                      |                                          |
| 4  | Ga2  | 0.000    | 0.000     | 0.241(3) | 0.500 | 4e   | symmetry                                             | hexagonal                                |
| 5  | Ga3  | 0.333    | 0.666     | 0.026(8) | 0.625 | 4f   |                                                      |                                          |
| 6  | Mg3  | 0.333    | 0.666     | 0.026(8) | 0.375 | 4f   |                                                      |                                          |
| 7  | Ga4  | 0.333    | 0.666     | 0.188(4) | 0.800 | 4f   | Lattice<br>parameters<br>(Å)                         | <i>a=b=</i><br>5.805<br><i>c=</i> 22.702 |
| 8  | Cr4  | 0.333    | 0.666     | 0.188(4) | 0.200 | 4f   |                                                      |                                          |
| 9  | Ga5  | 0.833(3) | 0.166(7)  | 0.108(3) | 0.890 | 12k  |                                                      |                                          |
| 10 | Cr5  | 0.833(3) | 0.166(7)  | 0.108(3) | 0.110 | 12k  |                                                      |                                          |
| 11 | O1   | 0.000    | 0.000     | 0.150(3) | 1.000 | 4e   | R <sub>p</sub><br>R <sub>w</sub><br>R <sub>exp</sub> | 8.115<br>10.243<br>5.117                 |
| 12 | O2   | 0.666    | 0.333     | 0.057(9) | 1.000 | 4f   |                                                      |                                          |
| 13 | O3   | 0.182(0) | -0.182(0) | 0.250    | 1.000 | 6h   |                                                      |                                          |
| 14 | O4   | 0.152(0) | -0.152(0) | 0.053(3) | 1.000 | 12k  |                                                      |                                          |
| 15 | O5   | 0.505(0) | -0.505(0) | 0.151(3) | 1.000 | 12k  |                                                      |                                          |
| 16 | La1  | 0.666    | 0.333     | 0.250    | 0.770 | 2d   |                                                      |                                          |
| 17 | La2  | 0.732(3) | 0.267(7)  | 0.250    | 0.076 | 6h   |                                                      |                                          |

**Table S2** Important photoelectric parameters of the WLED device under different driving currents (50-400 mA).

| Device | Current<br>(mA) | $R_a$ | $CCT$<br>(K) | CIE (x,y)        | Luminous efficiency<br>(lm·W <sup>-1</sup> ) |
|--------|-----------------|-------|--------------|------------------|----------------------------------------------|
| WLED   | 50              | 89.0  | 4888         | (0.3499, 0.3686) | 68.93                                        |
|        | 100             | 90.5  | 4890         | (0.3502, 0.3721) | 64.47                                        |
|        | 150             | 91.5  | 4896         | (0.3502, 0.3743) | 60.33                                        |
|        | 200             | 91.4  | 4942         | (0.3487, 0.3731) | 53.92                                        |
|        | 250             | 92.4  | 4992         | (0.3472, 0.3728) | 51.80                                        |
|        | 300             | 94.2  | 5030         | (0.3464, 0.3762) | 52.43                                        |
|        | 350             | 94.6  | 5080         | (0.3449, 0.3765) | 50.53                                        |
|        | 400             | 91.9  | 5250         | (0.3394, 0.3658) | 42.63                                        |

## References

1. H. Wang, Y.X. Pan, Y.H. Ding, H.Z. Lian, J. Lin, L.Y. Li, *Adv. Opt. Mater.*, **2024**, 12(24) 2400935.
2. P. Zhang, Z.W. Luo, X.Y. Liu, P. He, S.X. Liu, W.C. Lei, H.Z. Liang, Z.Y. Zhou, A.X. Lu, *J. Alloys Compd.*, **2022**, 926 166844.
3. F.Q. He, E.H. Song, Y.Y. Zhou, H. Ming, Z.T. Chen, J.C. Wu, P.S. Shao, X.F. Yang, Z.G. Xia, Q.Y. Zhang, *Adv. Funct. Mater.*, **2021**, 31(36) 2103743.
4. M. Zhang, P.P. Dang, Y.J. Wan, Y.S. Wang, Z.X. Zeng, D.J. Liu, Q.Q. Zhang, G.G. Li, J. Lin, *Adv. Opt. Mater.*, **2024**, 12(15) 2302941.
5. G. Sivakumar, A.T.M. Munthasir, P. Thilagar, S. Natarajan, *Chem. Mater.*, **2024**, 36(11) 5356-5369.
6. X.Y. Dai, X.K. Zou, H.R. Zhang, W.B. Chen, C.W. Yang, M.S. Molokeev, Z.G. Xia, Y.L. Liu, X.J. Zhang, M.T. Zheng, B.F. Lei, *Adv. Opt. Mater.*, **2024**, 12 2302380.
